1                   **Pilot randomized controlled trial of acetylsalicylic acid to reduce cerebral**  
2                                           **microembolism in Chagas heart failure**

3

4           Renan Carvalho Castello-Branco<sup>1</sup>, MD, MSc; Cárita Victoria Carvalho de Santana<sup>1</sup>, MS;  
5           Victor L. P. P. Botelho<sup>1</sup>, MS; Paulo R. S. P. deSousa<sup>1</sup>, MD, MSc; Maria C.P. Nunes<sup>2</sup>, MD,  
6                   PhD; Karen L. Furie<sup>3</sup>, MD, MPH; Jamily Oliveira-Filho<sup>1</sup>, MD, MSc, PhD.

7

8           From the (1) Post-Graduate Program in Health Sciences (PPgCS), Hospital Universitario  
9           Professor Edgard Santos, Federal University of Bahia, Brazil; (2) Heart Failure Clinic,  
10          Hospital Universitário, Faculdade de Medicina, Universidade Federal de Minas Gerais; and  
11          (3) Neurology Service, Brown University.

12          Corresponding author: Jamily Oliveira-Filho, Neurologist and Post-Graduate Program in  
13          Health Sciences (PPgCS), Hospital Universitario Professor Edgard Santos, Federal University  
14          of Bahia, Brazil E-mail: [jamily@mail.harvard.edu](mailto:jamily@mail.harvard.edu). Phone: +5571981907550

15          Short Title: Microembolism and Chagas disease

16          Total word Count: 3.456

17

18

19

20

21

22

23

24

**Abstract:**

1  
2  
3  
4  
5  
6  
7  
8  
9  
10  
11  
12  
13  
14  
15  
16  
17  
18  
19  
20  
21  
22  
23  
24  
25

**Background:** Chagas disease is an important cause of heart failure (HF) and stroke, affecting over six million people. High intensity transient signals (HITS) are detected on transcranial Doppler (TCD) in patients with Chagas disease, but the effect of antithrombotic treatment on HITS is unknown. The aim of this study was to evaluate whether acetylsalicylic acid (ASA) reduces the frequency and number of HITS in patients with chagasic HF. Methods: Proof-of-principle pilot prospective, randomized, open and blinded endpoint clinical trial (PROBE), where patients with both Chagas and HITS were randomized 2:1 to ASA 300 mg for seven days and standard HF treatment or standard HF treatment alone (control group). The primary outcome was the proportion of HITS after one week, analyzed using chi-squared test. Results: 373 patients with HF were evaluated, HITS occurred in 22/190 (12%) chagasic patients and in 16/183 (8%) non-chagasic patients ( $p=0.531$ ). Twelve of the 22 (54%) chagasic patients were randomized to treatment with ASA ( $n = 8$ ) or without ASA ( $n = 4$ ). Two patients in the control group (50%) persisted with HITS after 7 days of treatment, compared to none in the ASA group,  $p=0.028$ . Median number of HITS decreased from 3.5 to 0 with ASA ( $p=0.012$ ) and 4.0 to 0.5 in the control group ( $p=0.095$ ), with no significant between-group difference ( $p=0.262$ ). No adverse events were reported. Conclusion: In this pilot clinical trial, ASA reduced the proportion of HITS in patients with Chagas disease HF.

Keywords: cardiomyopathy; Chagas disease; Cerebrovascular disease, microembolisms.

1 **Non-standard Abbreviations and Acronyms**

2

3 ASA: acetylsalicylic acid

4 ELISA: Enzyme-Linked Immunosorbent Assay

5 IQR: Interquartile range

6 LVEF: Left ventricle ejection fraction

7 HITS: High Intensity Transient Signals

8 HF: Heart Failure

9 MCA: middle cerebral arteries

10 PROBE: Prospective, randomized, open-label, blinded clinical

11 QVSFS: Questionnaire for Verifying Stroke-Free Status

12 TCD: Transcranial Doppler

13

14

15

16

17

18

19

20

21

22

23 **Introduction**

1 Chagas disease affects over 6 million people worldwide, mainly in Latin American countries;  
2 however, migration patterns have increased infected individuals in Europe, Japan, Australia,  
3 Canada and the United States.<sup>1</sup> Victims are often infected as children and up to a third  
4 eventually develop cardiomyopathy for the rest of their lives, increasing the risk of sudden  
5 death from arrhythmias and cerebral infarction.<sup>2, 3</sup>

6

7 The establishment of non-invasive methods to stratify the risk of stroke in patients with  
8 Chagas disease is a priority. Additionally, it is important to define alternative outcomes to test  
9 new treatments for stroke prevention in this population. Transcranial Doppler (TCD) is a  
10 non-invasive and safe method that allows the identification of microembolism in the cerebral  
11 circulation in real time. Inflammation and secondary activation of the hemostatic system is  
12 thought to increase the risk of thrombus formation and subsequent embolic stroke, especially  
13 in the presence of structural myocardial damage such as dilated cardiomyopathy.<sup>4, 5</sup> The  
14 microembolic events are also called high intensity transient signals (HITS), visualized on  
15 TCD as high intensity signals (usually > 3dB above its basal value), unidirectional, transient  
16 and with a specific sound.<sup>6</sup>

17

18 In patients with heart failure (HF), HITS occur more frequently in Chagas when compared to  
19 non-Chagas patients<sup>7</sup>, but it is unknown whether this increased risk can be modified by anti-  
20 thrombotic medications. In this sense, the aim of the study was to test the effectiveness of  
21 acetylsalicylic acid (ASA) in reducing the rate of HITS in patients with Chagas-associated  
22 heart failure.

23

24 **Methods**

1 This was a pilot proof-of-principle prospective, randomized, open-label, blinded clinical  
2 (PROBE) trial. Inclusion criteria were age above 18 years of age with HF defined according  
3 to Framingham clinical criteria formed by signs (progressive edema of the lower limbs and  
4 hepatomegaly not attributable to other diseases) and symptoms (dyspnea on exertion and  
5 paroxysmal nocturnal dyspnea) and classified according to the New York Heart Association  
6 functional class.<sup>8,9</sup> In addition, patients with Chagas disease had two positive serological tests  
7 (ELISA, immunofluorescence or hemagglutination assays). Patients with a history of stroke  
8 or atrial fibrillation related to cardiomyopathy were excluded.

9

10 Exclusion criteria were designed to avoid confounding variables for transcranial Doppler  
11 HITS detection, such as co-morbidities and use of oral anticoagulants. Patients with a history  
12 of untreated malignant neoplasm (except localized neoplasm of the skin), ischemic  
13 cerebrovascular disease (determined using the Questionnaire for Verifying Stroke-Free  
14 Status),<sup>10</sup> chronic dialysis renal failure or end-stage liver failure were excluded. Patients with  
15 HITS detected in the TCD were screened for exclusion criteria for using ASA.

16

17 Patients screened following the inclusion / exclusion criteria underwent TCD monitoring with  
18 a helmet. A single investigator performed all tests, blinded to all clinical data. The middle  
19 cerebral artery was monitored continuously unilaterally for one hour looking for the  
20 occurrence of HITS. Chagasic patients with HITS detected during monitoring were randomly  
21 allocated 2:1 to treatment with ASA 300mg for 7 days and their usual medications for HF  
22 treatment; or their medications for HF treatment alone. These patients performed a second  
23 TCD after seven days verify the effectiveness of ASA in reducing HITS with an investigator  
24 blinded to treatment allocation.

1

## 2 **Statistical analysis:**

3 The clinical data collected in Brazil was entered into a Research Electronic Data Capture  
4 (REDCap) database and analyzed using STATA version 14.1. Demographic and clinical  
5 characteristics were described as absolute and relative frequencies for categorical variables  
6 and mean/standard deviation or median/interquartile range for continuous variables,  
7 depending on its distribution. Normality of continuous variables were defined based on  
8 Kolmogorov-Smirnov test. Based on our preliminary data on the frequency of HITS in cases  
9 and controls (14% and 2%, respectively), we expected to recruit 37 chagasic patients with  
10 HITS. Considering a 15% refusal rate, we expected to randomize 30 patients for ASA or  
11 control treatment. With this sample size, we expected to have 80% power to detect a  
12 minimum reduction of 58% in the proportion of HITS in the ASA group compared to 10% in  
13 the control group. Unfortunately, the study was interrupted prematurely due to lack of  
14 funding and higher than expected refusal rates.

15

16 To compare the proportion of HITS between groups, we used chi-squared test with Yates  
17 correction. As a secondary analysis, we compared the median number of emboli using Mann  
18 Whitney U test. To compare the proportion of HITS between Chagas and non-Chagas groups  
19 we used logistic regression analysis to control for confounding factors.

20

21 The data that support the findings of this study are available from the corresponding author  
22 upon reasonable request. The study was approved on February 13, 2014 by the ethics  
23 committee of Professor Edgard Santos University Hospital - Federal University of Bahia,

1 Brazil and all patients signed informed consent. This clinical trial and its analysis plan were  
2 registered at [www.clinicaltrials.gov](http://www.clinicaltrials.gov) under number NCT01650792.

3

#### 4 **Results**

5 Of the patients included in the study, 373 underwent TCD, 190 (51%) with HF Chagas  
6 disease, median age 59 (interquartile range 35-65), 313 (83.9%) afrodescendants, 123 (65%)  
7 females. Most frequent cerebrovascular risk factor was hypertension, present in 116 (62%)  
8 patients. Median left ventricular ejection fraction was 42% (interquartile range 28-62).  
9 Chagas patients less frequently had comorbidities associated with other HF etiologies such as  
10 coronary artery disease, hypertension and diabetes. Table 1 shows the baseline characteristics  
11 of both populations.

12

13 Of the patients who underwent TCD, 41 (11%) patients presented with HITS, observed in  
14 22/190 (12%) of chagasic patients and in 16/183 (8.0%) of non-chagasic patients ( $p=0.531$ ).  
15 In the multivariable analysis adjusted for age, sex and left ventricle ejection fraction, Chagas  
16 disease was not associated with HITS (odds ratio = 1.33; 95% confidence interval = 0.60 –  
17 2.95).

18

19 Twelve of the 22 patients (54.5%) with Chagas disease were randomized to treatment with  
20 ASA ( $n=8$ ) or a control group ( $n=4$ ). Characteristics of both groups were similar (Table 2).  
21 The remaining patients refused consent mostly due to logistical issues (e.g., lived in a city far  
22 from the stroke center). After seven days, two patients in the control group (50%) persisted  
23 with HITS, while none in the ASA group persisted with HITS,  $p=0.028$ .

1

2 The median number of HITS decreased from 4.0 [(interquartile range (IQR) 1.3 – 6.8) to 0.5  
3 (IQR 0.0 – 4.8) in the control group (within-group p-value=0.095); and from 3.5 (IQR 1.3 –  
4 6.0) to none (in all patients) in the ASA-treated group (within-group p-value=0.012).  
5 However, the between-group difference was not significant (p=0.262). The Figure 1 shows  
6 the difference in number of HITS between days zero and seven. The figure 2 shows TCD  
7 control and intervention patients at day 0 and after 7 days.

8

## 9 **Discussion**

10 This proof-of-concept PROBE trial was carried out to evaluate the effectiveness of ASA in  
11 reducing the rate of cerebral microembolism in patients with chagasic HF. The main novel  
12 finding was a significant reduction in the proportion of HITS from baseline TCD after seven  
13 days of treatment with ASA 300mg in comparison with the control group. Additionally,  
14 Chagas patients with HITS treated with ASA showed a significant reduction in the number of  
15 HITS. Studies have demonstrated that antithrombotic therapy reduces the occurrence of  
16 microembolism in patients with carotid atherosclerotic disease, however the effectiveness of  
17 ASA in reducing the rate of HITS in patients with HF, being tested as primary prophylaxis,  
18 had not been demonstrated until now.<sup>11, 12</sup> According to the Brazilian Guidelines on  
19 Antiplatelets and Anticoagulant Agents in Cardiology,<sup>13</sup> warfarin is indicated for primary  
20 prevention of stroke in chagasic patients considered at high risk, such as those with left  
21 ventricular thrombus or aneurysm. However, one cohort study actually identified the use of  
22 ASA as risk factor for stroke in patients with heart failure, possibly due to a deleterious effect  
23 on cardiac function (Cerqueira-Silva et al., 2022).<sup>2</sup> Since our study only evaluated short-term



1 effects of ASA treatment, longer-term effects of ASA or other anti-thrombotics should be  
2 studied in Chagas disease before firm recommendations can be made.

3

4 Patients with chagasic cardiomyopathy presented with a numerically higher proportion of  
5 HITS when compared to non-chagasic patients, data that agrees with another study, but did  
6 not reach statistical significance.<sup>7</sup> Moreover, in the multivariate analysis Chagas disease was  
7 not an independent risk factor for HITS in the first TCD. The other study<sup>7</sup> investigated  
8 patients with higher baseline risk of HITS, such as those with a history of stroke, which we  
9 could not include because these patients are usually already using anti-thrombotic  
10 medications. It is possible that our study was underpowered to show a difference in  
11 microembolic burden in this lower-risk population.

12

13 Other reasons for a lower-than-expected embolic risk may exist for this patient sample.  
14 Patients were younger than most stroke cohorts and predominantly female<sup>7, 14</sup> potentially  
15 lowering microembolic burden due to cardiovascular protective effects of endogenous  
16 estrogen in this age group. Patients with HF were predominantly mild/moderate functional  
17 class and frequently showed preserved left ventricular ejection fraction. Several studies have  
18 demonstrated a higher risk of embolism associated with reduced left ventricle ejection  
19 fraction, suggesting we selected a HF population with lower risk of embolism.<sup>15, 16</sup> Chronic  
20 inflammation in Chagas disease results in endothelial dysfunction that can stimulate the  
21 hemostatic system, increasing fibrin production and platelet activation and impacting the  
22 formation of microemboli, but this was not enough to account for a statistically significant  
23 increase in HITS in our sample.<sup>17-20</sup>

24

1 The limitations of the study refer to the early interruption and sample size not being reached,  
2 due to the repercussions resulting from the pandemic and the long time of the study. Some  
3 patients from the original cohort also suffered a stroke or died during follow-up, making them  
4 unavailable for the present trial.

5

6 In conclusion, we did not replicate the finding of a higher rate of HITS in patients with  
7 Chagas disease when compared to non-Chagas patients. In the patients with Chagas disease  
8 where HITS were identified, seven days of ASA treatment decreased the proportion of HITS  
9 when compared to no ASA treatment. Long-term effects of primary ASA prophylaxis in  
10 high-risk populations for stroke in Chagas disease should be further studied.

11

12 **Acknowledgments** the Stroke Clinic, Hospital Professor Edgard Santos, Federal University  
13 of Bahia, Brazil.

14

15 **Sources of Funding:** None

16

17 **Disclosures:** None

18

19

20 **References:**

21 1. Nunes MCP, Beaton A, Acquatella H, Bern C, Bolger AF, Echeverría LE, Dutra WO,  
22 Gascon J, Morillo CA, Oliveira-Filho J, Ribeiro ALP, Marin-Neto JA. American

- 1 Heart Association Rheumatic Fever, Endocarditis and Kawasaki Disease Committee  
2 of the Council on Cardiovascular Disease in the Young; Council on Cardiovascular  
3 and Stroke Nursing; and Stroke Council. Chagas Cardiomyopathy: An Update of  
4 Current Clinical Knowledge and Management: A Scientific Statement From the  
5 American Heart Association. *Circulation*. 2018;138(12):169-209.  
6
- 7 2. Cerqueira-Silva T, Gonçalves BM, Pereira CB, Porto LM, Marques ME, Santos LS,  
8 Oliveira MA, Félix IF, de Sousa PRP, Muiños PJ, Maia RM, Catto MB, Andrade AL,  
9 Jesus PA, Aras R, Oliveira-Filho J. Chagas disease is an independent predictor of  
10 stroke and death in a cohort of heart failure patients. *Int J Stroke*. 2022;17(2):180-188.  
11
- 12 3. Montanaro VVA, Silva GS, Oliveira Filho J, Pontes-Neto OM, do Carmo Pereira  
13 Nunes M, Bezerra RP, Sousa de Melo E, Valenca Patrizia Alves de Andrade L, Alves  
14 de Oliveira Junior W, Castro Alves de Meira F, Teixeira AL, Maria de Jesus Oliveira  
15 E, de Freitas GR. Exploring the Chagas disease-Stroke 'Connection': Findings from a  
16 Large Multicenter Study. *Cerebrovasc Dis*. 2024;1-5.  
17
- 18 4. Aslid R, Markwalder TM, Nornes H. Noninvasive transcranial Doppler ultrasound  
19 recording of flow velocity in basal cerebral arteries. *J Neurosurg*. 1982;57:769-774.  
20  
21  
22
- 23 5. Kaposzta Z, Yong E, Bath PMW, Markus HS. Clinical application of asymptomatic  
24 embolic signal detection in acute stroke: A prospectivestudy. *Stroke*. 1999;1814-1818.  
25

- 1       6. Edmonds HL Jr, Isley MR, Sloan TB, Alexandrov AV, Razumovsky AY. American  
2       Society of Neurophysiologic Monitoring and American Society of Neuroimaging joint  
3       guidelines for transcranial doppler ultrasonic monitoring. *J Neuroimaging*.  
4       2011;21(2):177-183.  
5
- 6       7. Jesus PA, Neville I, Cincurá C, Menezes DF, Vieira-de-Melo RM, Lacerda AM,  
7       Viana LC, Pereira DF, Ribeiro-dos-Santos V Jr, Reis FJ, Macedo C, Oliveira-Filho J.  
8       Stroke history and Chagas disease are independent predictors of silent cerebral  
9       microembolism in patients with congestive heart failure. *Cerebrovasc Dis*.  
10      2011;31(1):19-23.  
11
- 12      8. McKee PA, Castelli WP, McNamara PM, Kannel WB. The natural history of  
13      congestive heart failure: the Framingham study. *N Engl J Med*. 1971;285(26):1441-  
14      1446.  
15
- 16      9. Dolgin M, Association NYH, Fox AC, Gorlin R, Levin RI, New York Heart  
17      Association. Criteria Committee. Nomenclature and criteria for diagnosis of diseases  
18      of the heart and great vessels. 9th ed. Boston, MA: Lippincott Williams and  
19      Wilkins.1994;253-256.  
20
- 21      10. Jones WJ, Williams LS, Meschia JF. Validating the Questionnaire for Verifying  
22      Stroke-Free Status (QVSFS) by neurological history and examination. *Stroke*.  
23      2001;32(10):2232-2236.  
24

- 1 11. Junghans U, Siebler M: Cerebral microembolism is blocked by tirofiban, a selective  
2 nonpeptide platelet glycoprotein IIb/IIIa receptor antagonist. *Circulation*. 2003;107:  
3 2717-2721.  
4
- 5 12. Goertler M, Baeumer M, Kross R, Blaser T, Lutze G, Jost S, Wallesch CW: Cessation  
6 of embolic signals after antithrombotic prevention is related to reduced risk of  
7 recurrent arterioembolic transient ischaemic attack and stroke. *J Neurol Neurosurg*  
8 *Psychiatry*. 2002;72:338–342.  
9
- 10 13. Lorga Filho AM, Azmus AD, Soeiro AM, Quadros AS, Avezum A Jr, Marques AC,  
11 Franci A, Manica AL, Volschan A, De Paola AA, Greco AI, Ferreira AC, Sousa AC,  
12 Pesaro AE, Simão AF, Lopes AS, Timerman A, Ramos AI, Alves BR, Caramelli B,  
13 Mendes BA, Polanczyk CA, Montenegro CE, Barbosa CJ, Serrano CV Jr, Melo CC,  
14 Pinho C, Moreira DA, Calderaro D, Gualandro DM, Armaganijan D, Machado Neto  
15 EA, Bocchi EA, Paiva EF, Stefanini E, D'Amico E, Evaristo EF, Silva EE, Fernandes  
16 F, Brito FS Jr, Bacal F, Ganem F, Gomes FL, Mattos FR, Moraes Neto FR,  
17 Tarasoutchi F, Darrieux FC, Feitosa GS, Fenelon G, Morais GR, Correa Filho H,  
18 Castro I, Gonçalves I Jr, Atié J, Souza Neto JD, Ferreira JF, Nicolau JC, Faria Neto  
19 JR, Annichino-Bizzacchi JM, Zimmerman LI, Piegas LS, Pires LJ, Baracioli LM, Silva  
20 LB, Mattos LA, Lisboa LA, Magalhães LP, Lopes MA, Montera MW, Figueiredo MJ,  
21 Malachias MV, Gaz MV, Andrade MD, Bacellar MS, Barbosa MR, Clausell NO,  
22 Dutra OP, Coelho OR, Yu PC, Lavítola PL, Lemos Neto PA, Andrade PB, Farsky PS,  
23 Franco RA, Kalil RA, Lopes RD, Esporcatte R, Heinisch RH, Kalil Filho R, Giraldez  
24 RR, Alves RC, Leite RE, Gagliardi RJ, Ramos RF, Montenegro ST, Accorsi TA,  
25 Jardim TS, Scudeler TL, Moisés VA, Portal VL. Diretrizes brasileiras de

- 1 antiagregantes plaquetários e anticoagulantes em cardiologia [Brazilian guidelines on  
2 platelet antiaggregants and anticoagulants in cardiology]. *Arq Bras Cardiol.*  
3 2013;101(3 Suppl 3):1-95.
- 4
- 5 14. Siebler M, Kleinschmidt A, Sitzler M, Steinmetz H, Freund HJ. Cerebral  
6 microembolism in symptomatic and asymptomatic high-grade internal carotid artery  
7 stenosis. *Neurology.* 1994;44(4):615-618.
- 8
- 9 15. Zurab G, Nadareishvili Z, Choudary Z, Joyner C, Brodie D, Worriss J: Cerebral  
10 microembolism in acute myocardial infarction. *Stroke.* 1999;30:2679–2682.
- 11
- 12 16. Paixão LC, Ribeiro LC, Valacto RA, Teixeira AL: Chagas' disease: independent risk  
13 factor for stroke. *Stroke.* 2009;40:3691–3694.
- 14
- 15 17. Beamer NB, Coull BM, Clark WM, Briley DP, Wynn M, Sexton G. Persistent  
16 inflammatory response in stroke survivors. *Neurology.* 1998;50:1722-1728.
- 17
- 18 18. Chandrasekar B, Melby PC, Toyer DA, Colston JT, Freeman GL. Temporal expression  
19 of pro-inflammatory cytokines and inducible nitric oxide synthase in experimental  
20 acute chagasic cardiomyopathy. *Am J Pathol.* 1998;152:925-934.
- 21
- 22 19. Dutra WO, Menezes CAS, Magalhaes LMD, Gollob KJ. Immunoregulatory networks  
23 in human Chagas disease. *Parasite Immunol.* 2014;36:377–387.
- 24

1        20. Machado FS, Dutra WO, Esper L, Gollob KJ, Teixeira MM, Factor SM, Weiss LM,  
2        Nagajyothi F, Tanowitz HB, Garg NJ. Current understanding of immunity to  
3        Trypanosoma cruzi infection and pathogenesis of Chagas disease. *Semin*  
4        *Immunopathol.* 2012;34(6):753-770.

5

## 6    **Tables**

7

8    **Table 1. Baseline characteristics of patients with heart failure (HF) of Chagasic vs Non-**  
9    **Chagasic etiology.**

|                            | <b>Total<br/>(n=373)</b> | <b>Chagas disease<br/>HF<br/>(n=190)</b> | <b>Non-Chagas<br/>HF<br/>(n=183)</b> | <b>p value</b> |
|----------------------------|--------------------------|------------------------------------------|--------------------------------------|----------------|
| Age in years, median (IQR) | 59 (35-65)               | 55 (50-61)                               | 54 (43-63)                           | 0.094          |
| Female, n (%)              | 208 (56)                 | 123(65)                                  | 85(46)                               | <0.001         |
| Race                       |                          |                                          |                                      | <0.001         |
| - Asian                    | 6 (1.6)                  | 5 (2.6)                                  | 1 (0.5)                              |                |
| - White                    | 39 (10.4)                | 15 (7.9)                                 | 24 (13.1)                            |                |
| - Afrodescentants          | 313 (83.9)               | 135 (71.0)                               | 178 (97.2)                           |                |
| Hypertension, n (%)        | 243 (65)                 | 116 (62)                                 | 121(68)                              | <0.001         |
| Diabetes mellitus, n (%)   | 75(20)                   | 33 (17)                                  | 41(23)                               | <0.001         |
| Smoking, n (%)             | 123 (31)                 | 63 (33.0)                                | 60 (33)                              | 0.308          |

|                                                         |            |            |            |        |
|---------------------------------------------------------|------------|------------|------------|--------|
| Use of antiplatelet agents, n (%)                       | 87 (23)    | 34 (18)    | 49 (27)    | <0.001 |
| Use of statins, n (%)                                   | 91 (24)    | 48 (25)    | 40 (22)    | <0.001 |
| Coronary artery disease, n (%)                          | 73 (20)    | 24 (13)    | 47 (26)    | <0.001 |
| Functional Class, n (%)                                 |            |            |            | <0.001 |
| I                                                       | 101 (29)   | 54 (30)    | 45 (28)    |        |
| II                                                      | 153 (44)   | 81 (46)    | 63 (39)    |        |
| III                                                     | 67 (19)    | 31 (18)    | 36 (22)    |        |
| IV                                                      | 25 (7)     | 10 (5)     | 13 (8)     |        |
| Left ventricle ejection fraction<br>in % - median (IQR) | 42 (28-62) | 50 (37-67) | 37 (29-47) | 0.919  |
| High intensity transient signals,<br>n (%)              | 41 (11%)   | 22 (12%)   | 16 (8.0%)  | 0.531  |

1

2 \*IQR: Interquartile range.

3

4 **Table 2. Primary outcome and clinical characteristics of Chagas disease patients**  
5 **randomized to acetylsalicylic acid (ASA) or control groups. HITS = high-intensity**  
6 **transient signals.**

|                  | <b>Total<br/>(n=12)</b> | <b>ASA (n=8)</b> | <b>Control<br/>Group (n=4)</b> | <b>p value</b> |
|------------------|-------------------------|------------------|--------------------------------|----------------|
| Primary outcome: |                         |                  |                                |                |



|                                   |            |            |            |       |
|-----------------------------------|------------|------------|------------|-------|
| HITS at 7 days, n (%)             | 2 (16.7)   | 0 (0)      | 2 (50)     | 0.028 |
| Age in years, median (IQR)        | 60 (55-70) | 61 (57-73) | 59 (52-70) | 0.213 |
| Female, n (%)                     | 11 (92)    | 7 (87)     | 4 (100)    | 0.460 |
| Race                              |            |            |            | 0.221 |
| - Asian                           | 0 (0)      | 0 (0)      | (0)        |       |
| - White                           | 0 (0)      | 0 (0)      | (0)        |       |
| - Afrodescentants                 | 12 (100)   | 8 (100)    | 4 (100)    |       |
| Hypertension, n (%)               | 10 (83)    | 7 (87)     | 3 (75)     | 0.584 |
| Diabetes mellitus, n (%)          | 2 (17)     | 1 (12)     | 1 (25)     | 0.584 |
| Smoking, n (%)                    | 0          | 0          | 0          | 0.679 |
| - Smokes                          | 0          | 0          | 0          |       |
| - Smoked                          | 7 (58)     | 5 (62)     | 2 (50)     |       |
| - Non-smoking                     | 5 (42)     | 3 (37)     | 2 (50)     |       |
| Use of antiplatelet agents, n (%) | 3 (25)     | 2 (25)     | 1 (25)     | 0.764 |
| Use of statins, n (%)             | 4 (33.3)   | 2 (25)     | 2 (50)     | 0.386 |
| Coronary artery disease, n (%)    | 2 (16)     | 2 (25)     | 0 (0)      | 0.273 |
| Functional Class, n (%)           |            |            |            | 0.687 |
| I                                 | 1 (11)     | 1 (14)     | 0 (0)      |       |
| II                                | 5 (55)     | 4 (57)     | 1 (50)     |       |
| III                               | 2 (22)     | 1 (14)     | 1 (50)     |       |
| IV                                | 1 (11)     | 1 (14)     | 0 (0)      |       |

|                                                         |                  |                |                 |       |
|---------------------------------------------------------|------------------|----------------|-----------------|-------|
| Left ventricle ejection fraction<br>in % - median (IQR) | 67 (60.7-<br>70) | 66.9 (60.7-70) | 67.6(61.6-71.8) | 0.358 |
|---------------------------------------------------------|------------------|----------------|-----------------|-------|

1 \*IQR: Interquartile range.

2

3

4 **Figure 1: Number of high-intensity transient signals (HITS) at baseline (day 0) and 7**

5 **days in acetylsalicylic acid (ASA)-treated or control group patients.**

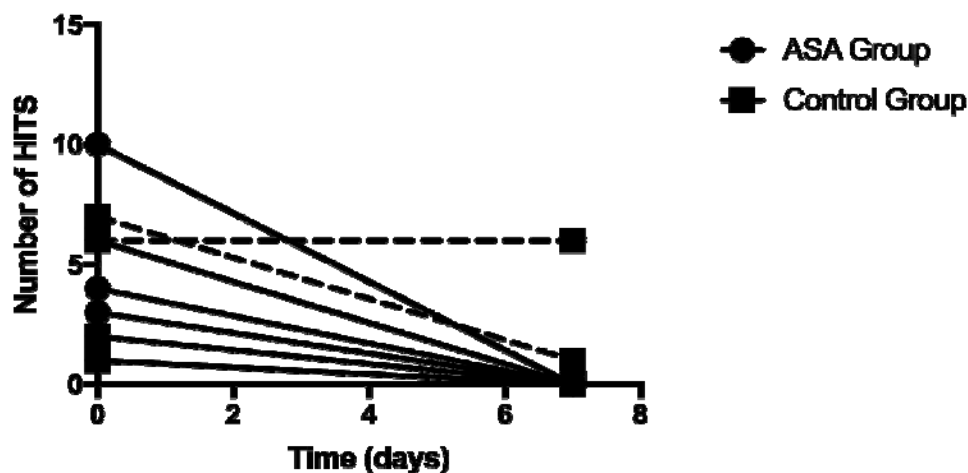

6

7

8

9 **Figure 2.**

10 **Patient in their 60s with Chagas disease randomized to acetylsalicylic acid use, LVEF=**

11 **66.9%. A: Baseline TCD showing HITS; B: TCD at 7 days showing no HITS.**

12 **Patient in their 60s with Chagas disease randomized to the control group, LVEF= 73%.**

13 **C: Baseline TCD showing HITS; D: TCD at 7 days showing HITS.**

14

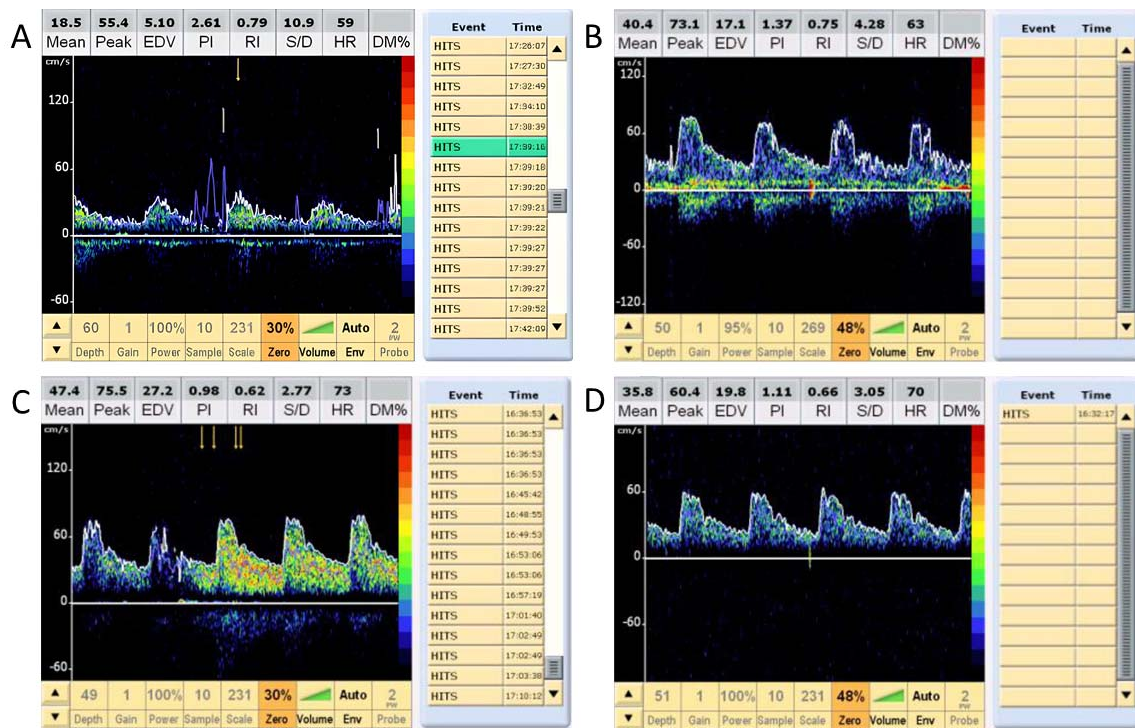

1  
2  
3  
4  
5  
6  
7

**Figure 1: Number of high-intensity transient signals (HITS) at baseline (day 0) and 7 days in acetylsalicylic acid (ASA)-treated or control group patients.**

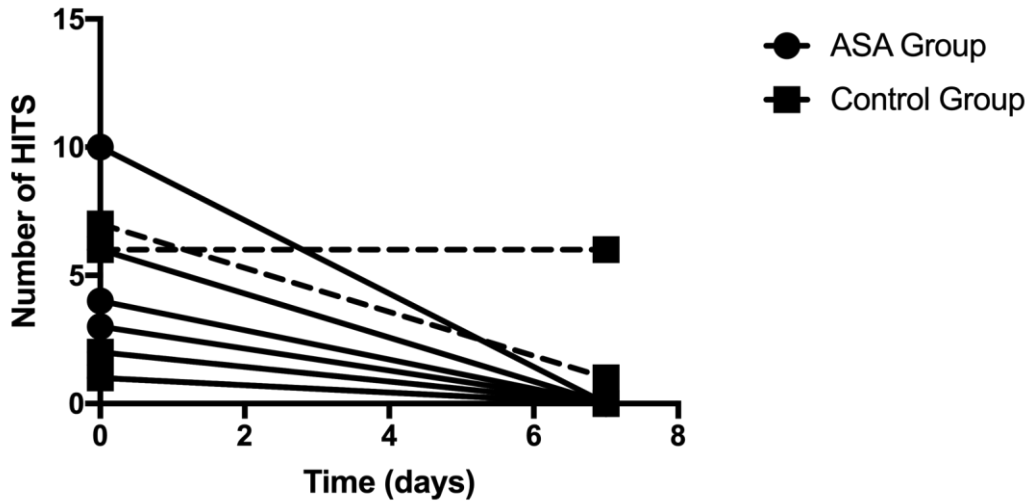



**Figure 2.**

**Patient in their 60s with Chagas disease randomized to acetylsalicylic acid use, LVEF= 66.9%. A: Baseline TCD showing HITS; B: TCD at 7 days showing no HITS.**

**Patient in their 60s with Chagas disease randomized to the control group, LVEF= 73%. C: Baseline TCD showing HITS; D: TCD at 7 days showing HITS.**

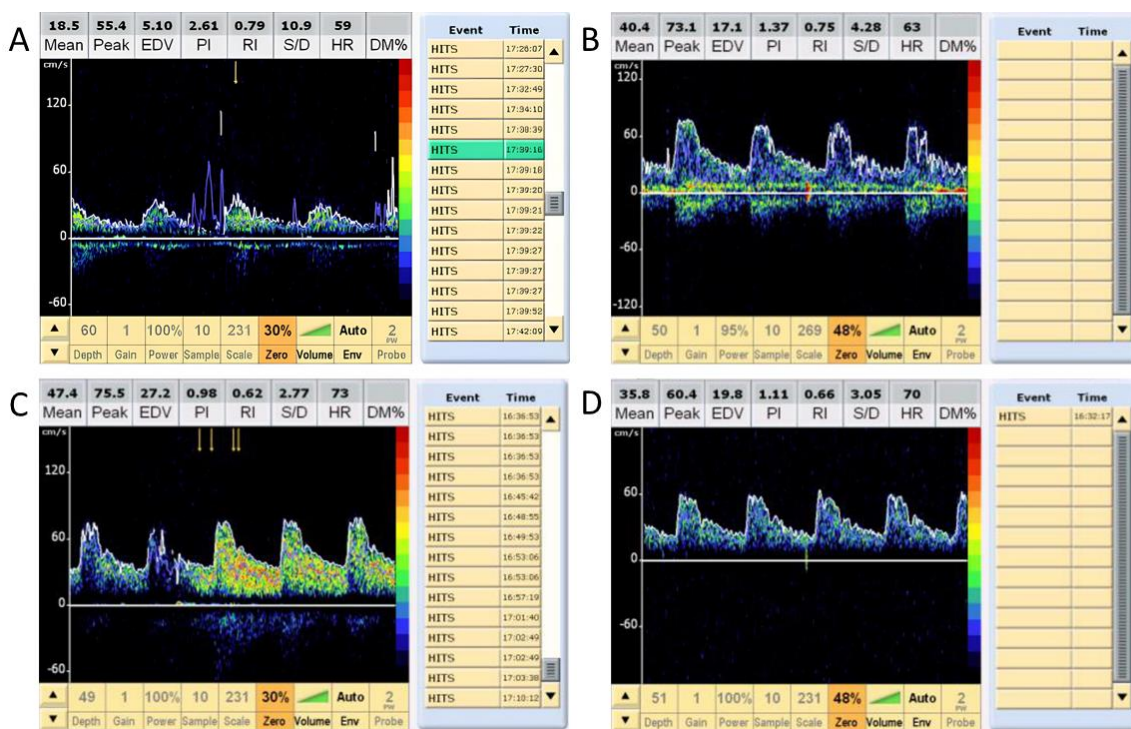

Source: https://medrxiv.org/content/10.1101/2024.10.09.24314743v1.full.pdf
